# Supplementary material for: Mental Well-Being during COVID-19: A Cross-Sectional Study of Fly-In Fly-Out Workers in the Mining Industry in Australia
Source: MDPI journal article supplement (doi:10.3390/ijerph182212264), 2021-11-22
Supplement: s1 [file s1]

**Table S1.** Bonferroni post hoc comparison of mental well-being between independent variable groups.

| Characteristics                             | coefficient | <i>p</i> -value |
|---------------------------------------------|-------------|-----------------|
| <b>Age group</b>                            |             |                 |
| 24 vs 25-34                                 | -0.502      | 1.000           |
| 24 vs 35-44                                 | -0.122      | 1.000           |
| 24 vs 45-54                                 | 0.467       | 1.000           |
| 24 vs 55+                                   | 2.290       | 0.048           |
| 25-34 vs 35-44                              | 0.380       | 1.000           |
| 25-34 vs 45-54                              | 0.969       | 0.354           |
| 25-34 vs 55+                                | 2.792       | <0.001*         |
| 35-44 vs 45-54                              | 0.589       | 1.000           |
| 35-44 vs 55+                                | 2.412       | <0.001*         |
| 45-54 vs 55+                                | 1.823       | 0.001*          |
| <b>Travel quarantine</b>                    |             |                 |
| No vs Yes                                   | -1.311      | 0.047*          |
| <b>Self-isolation</b>                       |             |                 |
| No vs Yes                                   | -1.575      | 0.027*          |
| <b>Impact by social distance guidelines</b> |             |                 |
| No vs Yes                                   | -1.128      | 0.002*          |
| <b>COVID-19 related symptoms</b>            |             |                 |
| None vs one symptom                         | -1.530      | 0.020*          |
| None vs 2 or more symptoms                  | -2.348      | <0.001*         |
| One symptom vs 2 or more symptoms           | -0.818      | 0.828           |

\*significant at  $p < 0.05$ .
